# Supplementary material
Source: Springer Nature journal article supplement (https://www.springermedizin.de/resource/supplementary/13075_2009_2788_MOESM3_ESM.pdf/9692884)

- No enthesitis + no peripheral arthritis (n = 457)    ▒ Enthesitis + no peripheral arthritis (n = 512)
- ▨ Peripheral arthritis + no enthesitis (n = 107)    ■ Enthesitis + peripheral arthritis (n = 174)

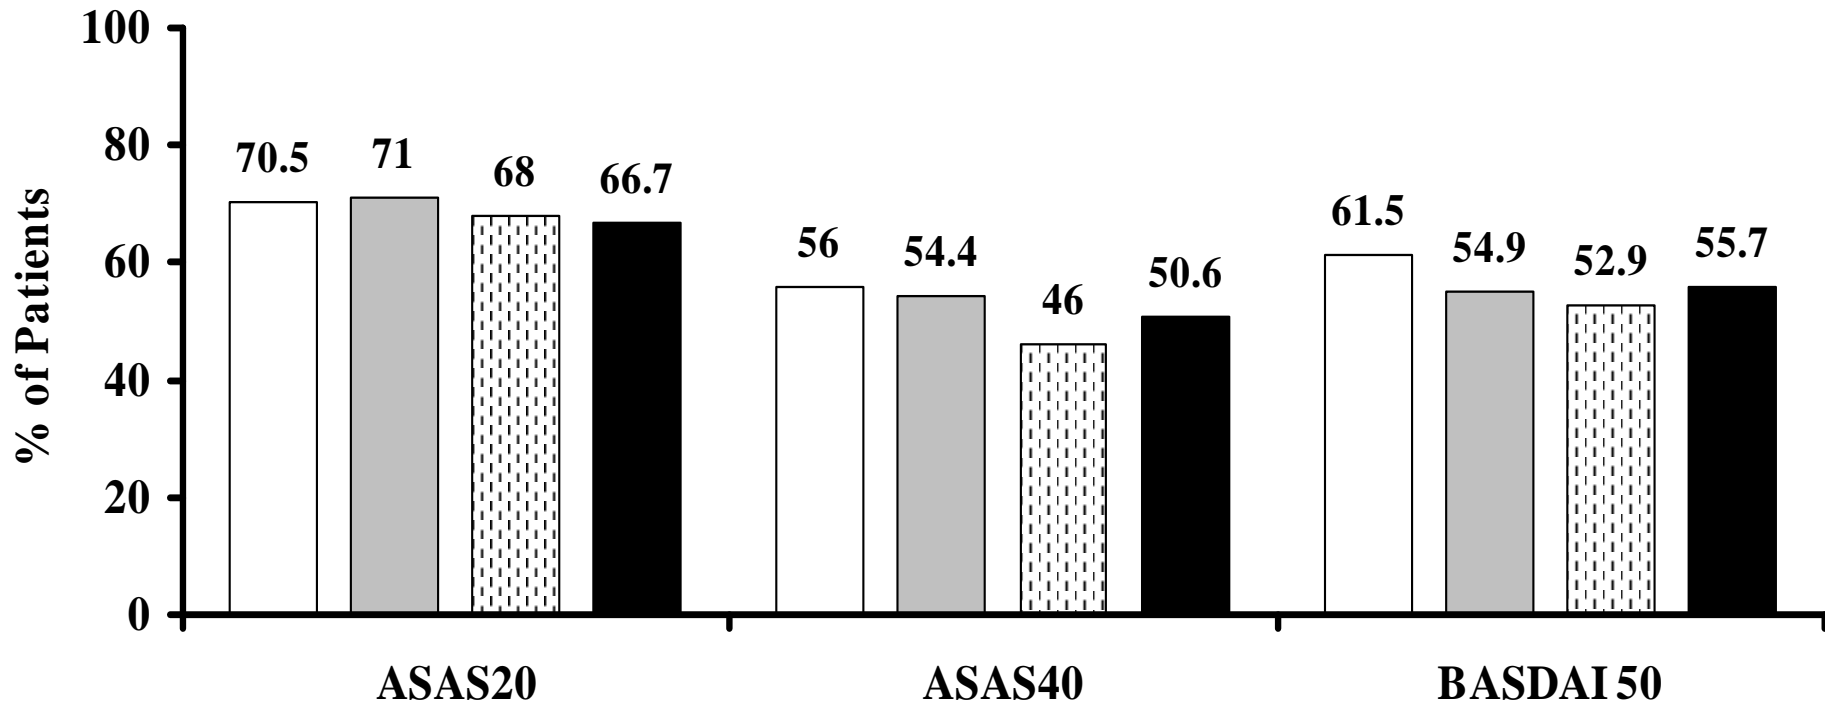

Supplement: MOESM3 [file 9692884]
